1 The transcriptome of *Balamuthia mandrillaris* trophozoites for structure-based drug  
2 design

3 Isabelle Q. Phan<sup>1,2\*Δ</sup>, Christopher A. Rice<sup>3,†\*Δ</sup>, Justin Craig<sup>1,4</sup>, Rooksana E. Noorai<sup>5</sup>, Jacquelyn  
4 McDonald<sup>2</sup>, Sandhya Subramanian<sup>1,2</sup>, Logan Tillery<sup>1,4</sup>, Lynn K. Barrett<sup>1,4</sup>, Vijay Shankar<sup>6</sup>, James  
5 C. Morris<sup>7</sup>, Wesley C. Van Voorhis<sup>1,4,8,9</sup>, Dennis E. Kyle<sup>3</sup>, Peter J. Myler<sup>1,2,9,10Δ</sup>

6 <sup>1</sup>Seattle Structural Genomics Center for Infectious Disease (SSGCID), Seattle, Washington, USA.

7 <sup>2</sup>Center for Global Infectious Disease Research, Seattle Children's Research Institute, Seattle,  
8 Washington, USA.

9 <sup>3</sup>Center for Tropical and Emerging Global Diseases, University of Georgia, Athens, Georgia, USA.

10 <sup>4</sup>Center for Emerging and Re-emerging Infectious Diseases (CERID), Division of Allergy and  
11 Infectious Diseases, Department of Medicine, University of Washington, Seattle, Washington,  
12 USA.

13 <sup>5</sup>Clemson University Genomics and Bioinformatics Facility, Clemson University, Clemson, South  
14 Carolina, USA.

15 <sup>6</sup>Center for Human Genetics, Clemson University, Greenwood, South Carolina, USA.

16 <sup>7</sup>Eukaryotic Pathogens Innovation Center, Department of Genetics and Biochemistry, Clemson  
17 University, Clemson, South Carolina, USA.

18 <sup>8</sup>Department of Microbiology, University of Washington, Seattle, Washington, USA.

19 <sup>9</sup>Department of Global Health, University of Washington, Seattle, Washington, USA.

20 <sup>10</sup>Department of Pediatrics, University of Washington, Seattle, Washington, USA.

21 <sup>†</sup>Current Address: Department of Pharmaceutical and Biomedical Sciences, College of  
22 Pharmacy, University of Georgia, Athens, Georgia, USA.

23 \* Authors contributed equally to this work.

24

25 <sup>Δ</sup> Author correspondence: [isabelle.phan@seattlechildrens.org](mailto:isabelle.phan@seattlechildrens.org) (I.Q.P), [christopher.rice@uga.edu](mailto:christopher.rice@uga.edu)  
26 (C.A.R) and [peter.myler@seattlechildrens.org](mailto:peter.myler@seattlechildrens.org) (P.J.M).

27

28

29

30

31

32

## 33 Abstract:

34 *Balamuthia mandrillaris*, a pathogenic free-living amoeba (FLA), causes cutaneous skin lesions  
35 as well as the brain-eating disease: *Balamuthia* granulomatous amoebic encephalitis (GAE).  
36 These diseases, and diseases caused by other pathogenic FLA, *Naegleria fowleri* or  
37 *Acanthamoeba* species, are minimally studied from a drug discovery perspective; few targets  
38 have been validated or characterized at the molecular level, and little is known about the  
39 biochemical pathways necessary for parasite survival. Chemotherapies for CNS disease caused  
40 by *B. mandrillaris* require vast improvement. Current therapeutics are limited to a small number  
41 of drugs that were previously discovered in the last century through *in vitro* testing or identified  
42 after use in the small pool of surviving reports.

43 Using our recently published methodology to identify potentially useful therapeutics, we  
44 screened a collection of 85 compounds that have previously been reported to have antiparasitic  
45 activity. We identified 59 compounds that impacted growth at concentrations below 220  $\mu$ M.  
46 Since there is no fully annotated genome or proteome, we used RNA-Seq to reconstruct the  
47 transcriptome of *B. mandrillaris* and locate the coding sequences of the specific genes potentially  
48 targeted by the compounds identified to inhibit trophozoite growth. We determined the sequence  
49 of 17 of these target genes and obtained expression clones for 15 that we validated by direct  
50 sequencing.

## 51 Introduction

52 *Balamuthia mandrillaris* is a ubiquitous soil-dwelling amoeba that is the causative agent of  
53 GAE<sup>1-4</sup>. In common with the other two major pathogenic free-living amoebas (FLAs), *Naegleria*  
54 *fowleri* and *Acanthamoeba castellanii*, *B. mandrillaris* infections, though uncommon, have >  
55 90% case fatality rate<sup>5</sup>. In the United States, 109 *Balamuthia* cases in both immunocompetent  
56 and immunocompromised individuals have been reported with at least twice that many  
57 worldwide, but these rates of GAE are likely to be underestimated due to historically poor  
58 diagnosis<sup>6</sup>. Nonetheless, awareness of potential cases has been on the rise<sup>7,8</sup>. In addition to  
59 diagnostic awareness, increasing rates of amoebic infections in northern regions of the United  
60 States could also be early indicators that recent emergence of these diseases might be associated  
61 with global warming<sup>6</sup>. In contrast to *Naegleria* infections that present and progress extremely  
62 rapidly after exposure, *Balamuthia* incubation times might be as long as several months and  
63 disease progression more subacute or chronic, increasing the opportunity for therapeutic  
64 intervention<sup>9</sup>. However, treatment options remain very limited, leading to poor outcomes even  
65 with the correct diagnosis.

66  
67 The recent development of an inexpensive and easily prepared media, as well as increasing  
68 interest in *B. mandrillaris* as a public health concern, has facilitated the development of robust  
69 high-throughput drug screening methods. Where low throughput methods restricted screening to  
70 ~10-20 drugs at a time, the new high-throughput methods allow rapid screening of hundreds to  
71 thousands of drugs simultaneously and allows direct comparisons of activity. In this study, we  
72 identify FDA approved drugs that could potentially be repurposed for therapy alone or added

73 into a combination drug cocktail against *B. mandrillaris*. These drugs can also be used as leads  
74 for further structure-based drug discovery (SBDD) exploration and *in vivo* efficacy studies.

75 Structure based drug discovery (SBDD) was originally devised in the mid 1980's<sup>10</sup>. With  
76 advances in methodology for protein structure elucidation, less expensive and faster computer  
77 processing, and improved access to prediction software, the timeline of solving target structures  
78 and developing specific and selective drugs have significantly shortened<sup>10</sup>. SBDD has been  
79 discussed by several authors throughout the amoeba literature as an attractive method of  
80 designing selective enzymatic inhibitors that would specifically target the parasite over the  
81 human host<sup>11</sup>. Given how frequently this strategy is discussed, it is surprising that only a small  
82 number of laboratories have actually tested this methodology in practice against pathogenic  
83 FLA. Sterol biosynthesis has been the most attractive target since parasites utilize ergosterol over  
84 cholesterol for making cell plasma membranes with distinct host biosynthetic differences that  
85 could be selectively targeted<sup>12-14</sup>. Glucose metabolism is essential for parasitic cell viability.  
86 Milanec *et al.*, recently targeted glucokinase in *Naegleria fowleri*, and described NfGleK specific  
87 inhibitors with minimal activity against human glucokinase in recombinant enzymatic functional  
88 studies<sup>15</sup>. Other studies have looked at targeting histidine or shikimate essential amino acid  
89 biosynthetic pathways in *Acanthamoeba* species, which the hosts cannot synthesize *de novo*, as  
90 parasite specific targets for drug intervention<sup>16,17</sup>.

91 The development of new compounds against *B. mandrillaris* in particular has been hampered by  
92 the paucity of genomic information. Though draft genomes have been published, no structural  
93 and functional annotation is currently available<sup>18,19</sup>. This information is essential for the design  
94 of new drugs by SBDD, as that methodology requires information about the molecular structure  
95 of the target protein. Once the protein coding sequences are annotated on the genome, rapid  
96 selection of multiple drug targets can be performed, for example by homology searches with  
97 known drug targets, thus paving the way for combinational therapy, a broadly established  
98 strategy to minimize the risk of drug resistance. This study presents the first comprehensive  
99 proteome of *B. mandrillaris* reconstructed from RNA sequencing of logarithmic growing  
100 trophozoites, the infective form of the amoeba. Potential drug targets identified through  
101 phenotypic screening were selected specifically from the trophozoite transcriptome and PCR  
102 amplified. The clones were further validated by direct sequencing, providing the first step for  
103 recombinant expression and crystallization by the Seattle Structural Genomics Center for  
104 Infectious Disease (SSGCID) high-throughput gene-to-structure pipeline<sup>20</sup>.

## 105 Results and discussion

### 106 Phenotypic screens

107 We performed a drug susceptibility screen of 85 compounds, previously identified as  
108 antiparasitic, against the trophozoite stage of *B. mandrillaris*, and discovered that 59 of these  
109 compounds had 50% inhibitory concentration (IC<sub>50</sub>) efficacy at ≤ 220 μM concentration (**Table**  
110 **1**). Two compounds (dequalinium choride and alexidine) possessed nanomolar potency. We  
111 found that many of the current drugs used within the treatment regimen for *Balamuthia* GAE  
112 appeared to be only moderately to slightly efficacious, with IC<sub>50</sub> activity ranging from 18.35 μM

113 (pentamidine) to > 163.25  $\mu$ M (fluconazole). Here we should also note that miltefosine, the  
 114 newest drug addition to the amoebae chemotherapy cocktail, was inactive at the final screening  
 115 concentration of > 122.68  $\mu$ M.

116

**Table 1.** Dose response activity of compounds tested against *B. mandrillaris* (N=2).

| <b>Compound</b>             | <b>IC<sub>50</sub> (<math>\mu</math>M) <math>\pm</math> SEM</b> | <b>Compound</b>         | <b>IC<sub>50</sub> (<math>\mu</math>M) <math>\pm</math> SEM</b> |
|-----------------------------|-----------------------------------------------------------------|-------------------------|-----------------------------------------------------------------|
| Dequalinium chloride        | 0.26 $\pm$ 0.05                                                 | Pyrimethamine           | 52.15 $\pm$ 2.01                                                |
| Chlorhexidine               | 1.00 $\pm$ 0.09                                                 | Sitamaquine             | 52.45 $\pm$ 2.57                                                |
| Fluvastatin sodium          | 1.18 $\pm$ 0.24                                                 | 5-fluorouracil          | 56.63 $\pm$ 2.72                                                |
| Atorvastatin                | 1.26 $\pm$ 0.25                                                 | Promethazine            | 66.79 $\pm$ 8.93                                                |
| HSP990                      | 1.80 $\pm$ 0.02                                                 | Dyclonine HCL           | 81.27 $\pm$ 1.51                                                |
| Simvastatin                 | 3.03 $\pm$ 0.31                                                 | Sulconazole             | 81.51 $\pm$ 44.20                                               |
| Hexamidine                  | 4.46 $\pm$ 0.54                                                 | Dibucaine HCL           | 83 $\pm$ 0.65                                                   |
| WR 99210                    | 4.93 $\pm$ 0.08                                                 | Terbinafine             | 83.25 $\pm$ 26.05                                               |
| Octamidine                  | 5.19 $\pm$ 0.01                                                 | Flucytosine $\Delta$    | 86.34 $\pm$ 17.60                                               |
| PHMB                        | 5.84 $\pm$ 1.60                                                 | Desipramine             | 88.87 $\pm$ 1.67                                                |
| Propamidine                 | 6.50 $\pm$ 0.63                                                 | Sinefungin              | 91.01 $\pm$ 4.83                                                |
| Valnemulin                  | 11.79 $\pm$ 1.12                                                | Allopurinol             | 92.17 $\pm$ 3.31                                                |
| PS-15 (WR 250417)           | 14.02 $\pm$ 1.14                                                | Floxuridine             | 93.18 $\pm$ 3.34                                                |
| Benzalkonium chloride       | 14.09 $\pm$ 0.07                                                | Primaquine              | 101.75 $\pm$ 7.94                                               |
| Oligomycin B                | 14.92 $\pm$ 0.97                                                | Tubercidin              | 123.17 $\pm$ 0.23                                               |
| JPC 2056                    | 15.13 $\pm$ 0.43                                                | Fluridone               | 220.80 $\pm$ 2.87                                               |
| Radicicol                   | 15.22 $\pm$ 1.51                                                | Caspofungin             | > 45.73                                                         |
| Trans-Mirincamycin          | 15.42 $\pm$ 2.84                                                | Amphotericin B $\Delta$ | > 54.11                                                         |
| Mefloquine                  | 16.54 $\pm$ 3.22                                                | Spiramycin A            | > 59.31                                                         |
| Domiphen bromide            | 17.08 $\pm$ 0.17                                                | Roxithromycin           | > 59.73                                                         |
| Auranofin                   | 18.24 $\pm$ 0.57                                                | Azithromycin            | > 66.75                                                         |
| Pentamidine $\Delta$        | 18.35 $\pm$ 1.47                                                | Clarithromycin $\Delta$ | > 66.85                                                         |
| Cis-Mirincamycin            | 18.58 $\pm$ 1.70                                                | Natamycin               | > 75.11                                                         |
| Clindamycin                 | 22.88 $\pm$ 1.05                                                | Neomycin                | > 81.35                                                         |
| Chlorpromazine              | 24.82 $\pm$ 1.78                                                | Tafenoquine succinate   | > 85.97                                                         |
| Solithromycin               | 29.66 $\pm$ 0.61                                                | Lumefantrine            | > 94.53                                                         |
| Ketoconazole                | 29.89 $\pm$ 10.62                                               | Verapamil HCL           | > 101.82                                                        |
| Pyronaridine tetraphosphate | 33.56 $\pm$ 1.11                                                | Fumagillin              | > 109.04                                                        |
| Amodiaquine                 | 33.58 $\pm$ 3.46                                                | Sertaconazole           | > 114.22                                                        |
| Asenapine                   | 40.76 $\pm$ 6.16                                                | Miltefosine $\Delta$    | > 122.68                                                        |
| Tioconazole                 | 42.06 $\pm$ 28.45                                               | Atovaquone              | > 136.30                                                        |
| Difenoconazole              | 44.92 $\pm$ 19.00                                               | Povidone-Iodine         | > 137.00                                                        |

|                    |               |                  |          |
|--------------------|---------------|------------------|----------|
| Halofuginone       | 46.08 ± 0.18  | Voriconazole     | > 143.14 |
| Dihydroartemisinin | 49.06 ± 2.72  | Furosemide       | > 151.17 |
| Itraconazole       | 49.20 ± 21.66 | Quinine          | > 154.12 |
| Posaconazole       | 49.57 ± 12.09 | Chloroquine      | > 156.31 |
| Paromomycin        | 50.03 ± 0.50  | Fluconazole Δ    | > 163.25 |
| Clotrimazole Δ     | 51.53 ± 23.21 | Norflurazon      | > 164.65 |
| Climbazole         | 51.66 ± 13.23 | Chlorpheniramine | > 181.96 |
| Artesunate Δ       | 52.05 ± 4.42  | Proguanil        | > 197.06 |
|                    |               | Glyphosate       | > 295.73 |

Compounds annotated with Δ have been previously used to try and treat GAE or cutaneous infections.

117  
118 **Table 1. Phenotypic analysis of 85 compounds against logarithmic trophozoites *in vitro*.** Compounds annotated  
119 with Δ were previously used within known patients' treatment regimens for *Balamuthia* GAE or cutaneous  
120 *Balamuthia* infections. The susceptibility is ranked in order of highly potent (left hand side column) to minimal  
121 potency (right hand side column) and the inhibitory concentration that causes 50% ATP depletion (death) is listed  
122 (IC<sub>50</sub>). All compounds were initially screened from 50 μg/ml and converted to molarity for standardized testing.

123  
124 Based on previously determined *in vitro* activity and the few surviving cases of *Balamuthia* GAE  
125 infections, the Centers for Disease Control and Prevention (CDC) recommends that the drug  
126 cocktail regimen for treating disease include a combination of pentamidine, sulfadiazine,  
127 flucytosine, fluconazole, azithromycin or clarithromycin, and miltefosine<sup>6</sup>. We thus proceeded to  
128 test these compounds, starting with the macrolides. Our screening results consistently indicate  
129 that the compounds belonging to the macrolide drug class (azithromycin, clarithromycin,  
130 roxithromycin, and spiramycin) are inactive, in agreement with previous results<sup>21</sup>. Interestingly,  
131 solithromycin, a known ketolide antibiotic against macrolide-resistant Streptococcal species<sup>22</sup>,  
132 appeared to show moderate activity against *B. mandrillaris* (29.66 μm). We found that other  
133 macrolides such as amphotericin B and natamycin, examples of polyene antimycotics, a  
134 subgroup of macrolides, that are generally used for targeting ergosterol within fungal cell  
135 membranes<sup>23</sup>, were also inactive against *B. mandrillaris*. We then tested the azole compounds.  
136 CDC studies reported that fluconazole was inactive at concentrations lower than 10 μg/ml<sup>24</sup>. We  
137 were able to confirm the fluconazole result; however, other antifungal azoles (ketoconazole,  
138 tioconazole, difenoconazole, itraconazole, posaconazole, clotrimazole, climbazole, and  
139 sulconazole) displayed better, though still moderate, activity (29.89-81.51 μm). We tested  
140 flucytosine and miltefosine and both displayed moderate to poor activity against *B. mandrillaris*  
141 with an IC<sub>50</sub> of 86.34 and > 122 μm, respectively. Flucytosine was previously described at 10  
142 μg/ml (77 μm) to inhibit 61% *Balamuthia* cytopathogenicity, these and our results suggest an  
143 equipotency agreement<sup>25</sup>. Although miltefosine has been reported to have moderate activity at  
144 concentrations of 63-100 μm<sup>25,26</sup>, another study<sup>27</sup> as well as ours suggest miltefosine activity  
145 may be less potent with a higher IC<sub>50</sub> of >122 μm. As for pentamidine, our results are consistent  
146 with prior studies that obtained comparable IC<sub>50</sub> values between 9 and 29 μm<sup>24,28,29</sup>. Thus, of the  
147 combination drug cocktail recommended by the CDC, only pentamidine and flucytosine appears  
148 to have *in vitro* activity against *B. mandrillaris*, though we were unable to test sulfadiazine. It is  
149 possible that the recommended drug therapy is active in combination, and not when tested in  
150 isolation as in this study. It is also possible that the drugs are biologically activated *in vivo* or are

151 only active against an *in vivo* form that we have not assayed. We therefore cannot rule out  
152 activity for the recommended drugs based solely on our *in vitro* sensitivity screens.

153  
154 We previously identified statins, which target 3-hydroxy-3-methylglutaryl-coenzyme A  
155 reductase A (HMG-CoA), as active compounds against *B. mandrillaris*<sup>29</sup>. As part of this study,  
156 we tested three additional statins: fluvastatin, atorvastatin and simvastatin and observed that they  
157 were active against *B. mandrillaris* at 1.18 to 3.03  $\mu\text{M}$  concentration. Simvastatin and fluvastatin  
158 in particular have been shown to have better brain penetration compared to other statins<sup>30</sup>,  
159 indicating potential for off-label drug repurposing.

160  
161 From a drug-repurposing standpoint, the compounds described in this study yielded a plethora of  
162 potentially useful drugs that act on *B. mandrillaris*. However, none of the active compounds in  
163 our screens has known mechanisms of action in *Balamuthia* where the specific protein target has  
164 been identified. To increase the pool of potential protein targets, we incorporated results from  
165 our previous drug discovery studies. These include screening the MMV Malaria and Pathogen  
166 boxes that identified 11 compounds with equipotency to nitroxolone (8-Hydroxy-5-  
167 nitroquinoline) IC<sub>50</sub> of 2.84  $\mu\text{M}$ <sup>25</sup>, indicating these molecules could be used as an initial starting  
168 point for medicinal chemistry structure activity relationship (SAR) studies. More recently, we  
169 identified 63 compounds through screening the Calibr ReFRAME drug repurposing library, with  
170 activities ranging from 40 nM to 4.8  $\mu\text{M}$ <sup>29</sup>. Chemical inference from our previous drug screening  
171 efforts and the results from this study identified a total of 52 potential protein targets in *B.*  
172 *mandrillaris*. These were reduced to 25 after excluding kinases. These 25 protein targets and an  
173 additional six community targets of interest were submitted for structural determination to the  
174 Seattle Structural Genomics Center for Infectious Diseases (SSGCID) gene-to-structure pipeline.

175  
176 The first step of the SSGCID pipeline involves cloning of the *B. mandrillaris* sequences  
177 encoding the protein targets identified in the screens. However, lack of annotation of the  
178 *Balamuthia* genome hampered these efforts: although we were able to locate some sequences  
179 using BLAST searches of the *Balamuthia* genome using the human and *Acanthamoeba*  
180 homologues, PCR amplification from *B. mandrillaris* cDNA (or gDNA) was not successful.  
181 Therefore, transcriptome sequencing of *Balamuthia* was performed.

## 182 Transcriptome sequencing, assembly and functional annotation

183 We reconstructed a haploid version of *B. mandrillaris* proteome and estimated that our set of  
184 14.5K proteins was 90% complete according to standard benchmark. Comparison with other  
185 species showed highest sequence similarity (averaging 45%) to *A. castellanii* strain Nef. We  
186 obtained functional annotation for over 80% of the proteins, and this information will serve as a  
187 reference for future functional studies as well as a source for target selection.

188  
189 The sequencing of RNA isolated from an axenic laboratory culture of *B.mandrillaris*  
190 trophozoites yielded 30,473,902 paired-end reads (2 x 75 bp). To build the proteome and  
191 compensate for the relatively short RNA-seq reads, we first performed both *de-novo* and  
192 genome-based assemblies and then predicted protein coding sequences (CDSs) with  
193 EvidentialGene (EviGene)<sup>31</sup>. In this hybrid approach, we combined two *de-novo* assemblies,

194 obtained from different assembly packages and multiple k-mers, and a genome-based assembly  
195 based on the existing *B. mandrillaris* genome LFUI01 (Figure 1)<sup>19</sup>.

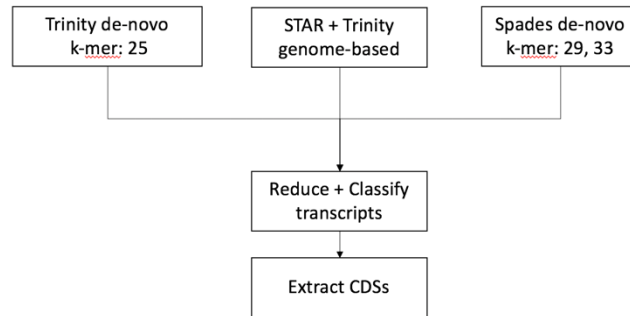

196  
197 **Figure 1: Overview of the main steps for predicting the *B. mandrillaris* proteome from RNA-seq reads using a**  
198 **hybrid approach.** *De-novo* and genome-based assemblies are combined and processed with EviGene to reduce  
199 transcript redundancy and classify transcripts as encoding complete or incomplete CDSs (5' and/or 3' truncated).  
200 CDSs are extracted, translated and annotated as "main" or alternate.  
201

202 This approach yielded a total of 37,252 transcripts, of which 20,005 contained complete CDSs.  
203 All CDSs were extracted, translated and resulting protein sequences annotated as either 'main' or  
204 alternate. The average length of the top 1,000 longest complete proteins was  $1,552 \pm 387$  amino  
205 acids, a number indicative of assembly quality that is roughly comparable to the corresponding  
206 value derived from the re-annotated AmoebaDBv44 *A. castellanii* proteome ( $1,688 \pm 539$ )<sup>32,33</sup>.  
207 EviGene classified a total of 14,492 sequences as "main" and we use this number as a proxy for  
208 estimating the size of the trophozoite haploid proteome. Although less than two-third of the  
209 EviGene "main" sequences were complete, they represented 90% of complete eukaryotic  
210 Benchmarking Universal Single-Copy Orthologs (BUSCOs), a standard measure to quantify  
211 relative accuracy and completeness (Table 2)<sup>34</sup>. Table 2 shows comparable levels of  
212 completeness for the transcriptome and the unannotated genome (LFUI01), but single copy  
213 BUSCO numbers indicate that the EviGene "main" proteins likely represent the haploid  
214 proteome.  
215

216 As expected, comparison to other species in the UniProt database with AAI-profiler indicates  
217 that the closest sequenced proteome is from *A. castellanii* strain Neff, although with only 27% of  
218 matched fraction, the two proteomes appear to be distantly related (Figure 2A). Note that the  
219 AAI-profiler does partial sampling as it relies on SANSparallel, a fast homology search that is as  
220 sensitive as BLAST above ca. 50% sequence identity<sup>35</sup>. A BLASTP search of EviGene 'main'  
221 proteins against *A. castellanii* returned hits for 65% of the *Balamuthia* sequences with an average  
222 identity of 44%. Only 38% of hits had over 50% identity, indicating that just about a third of the  
223 two proteomes overlap. Indeed, orthologous cluster analysis with *Dictyostelium discoideum* as  
224 the outgroup shows that 37% of the *Balamuthia* proteins cluster with *Acanthamoeba*, of which  
225 21% are shared between the three species (Figure 2B). This result and the high proportion of  
226 singletons (48%) highlights the divergence of *Balamuthia* from *Acanthamoeba*. To place the  
227 *Balamuthia* proteome in an evolutionary context, a neighbour-joining tree was constructed from  
228 an alignment-free comparison of complete proteomes from selected Amoebas, with the non-  
229 Amoebozoa *Naegleria* as outgroup (Figure 2C). As detected by AAI-profiler, the Discossea  
230 genera *Balamuthia* and *Acanthamoeba* are in a separate group from the Variosea genus  
231 *Planoprotostelium* and the Eumycetozoa Dictyostelids *Cavenderia*, *Polysphondylium*,

232 *Tieghemostelium* and *Dictyostelium*. The Evosea genus *Entamoeba* is in a separate branch from  
 233 the other Amoebozoa in the tree.  
 234

|                       | Assembled transcriptome |     | EviGene "main" proteins |     | Genome (LFUI01) |     |
|-----------------------|-------------------------|-----|-------------------------|-----|-----------------|-----|
| # input sequence      | 37,252                  |     | 14,492                  |     | 1,605           |     |
| Complete BUSCOs (C)   | 286                     | 94% | 272                     | 90% | 271             | 89% |
| single-copy (S)       | 92                      | 30% | 270                     | 89% | 166             | 55% |
| duplicated (D)        | 194                     | 64% | 2                       | 1%  | 105             | 35% |
| Fragmented BUSCOs (F) | 4                       | 1%  | 6                       | 2%  | 10              | 3%  |
| Missing BUSCOs (M)    | 13                      | 4%  | 25                      | 8%  | 22              | 7%  |

235  
 236 **Table 2. Quality and completeness assessment of the assembled transcriptome, the EviGene “main” proteins**  
 237 **and the draft genome relative to the dataset for eukaryotes eukaryota\_odb9.** Input sequences for retrieving  
 238 BUSCOs are proteins for the proteomes and scaffolds for the genomes. Note: the reduction of duplicates in the set of  
 239 ‘main’ proteins compared to the full assembly to under 1%, at a marginal cost of 4% loss of complete BUSCOs.  
 240

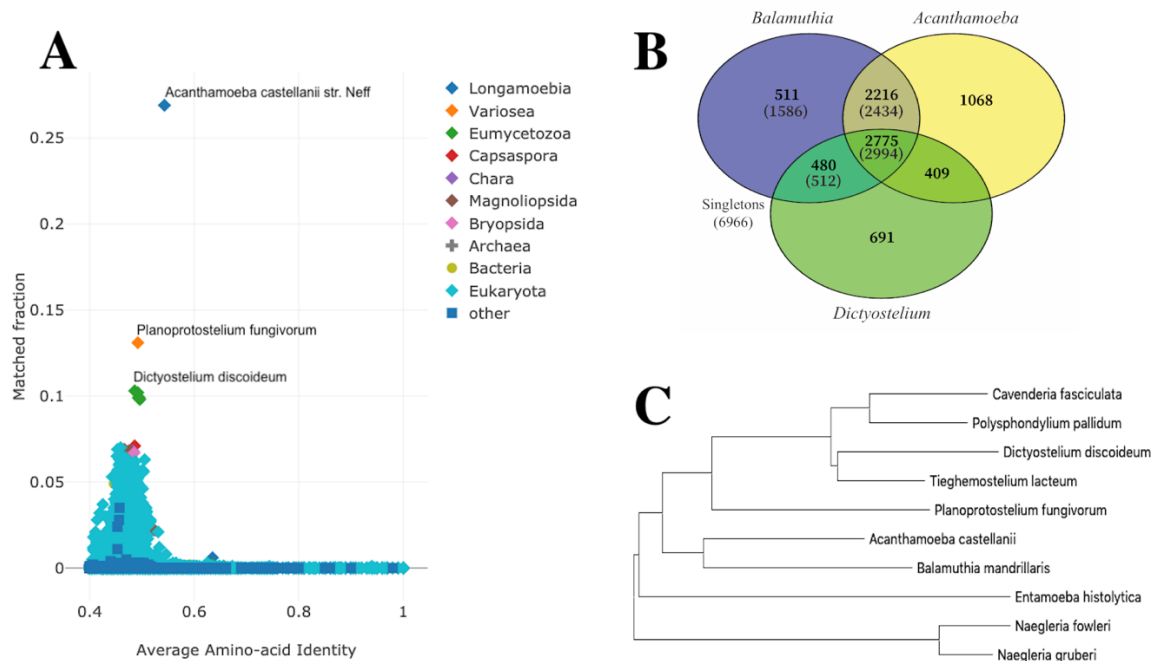

241  
 242  
 243 **Figure 2A: AAI-profiler scatterplot** of UniProt species with greater than 40% average amino-acid identity to the  
 244 *Balamuthia* ‘main’ proteins. The species name of the top three proteomes with the largest fraction of matches to  
 245 *Balamuthia* are indicated. **Figure 2B: Venn diagram** showing the overlap between orthologous cluster groups in  
 246 the proteomes of *B. mandrillaris*, *A. castellanii* and *D. discoideum*. Total numbers of *B. mandrillaris* proteins in  
 247 each group are in parenthesis. **Figure 2C: Neighbour-joining tree.** The closest Amoebozoa species was  
 248 *Acanthamoeba* detected by AAI-profiler with two *Naegleria* and one *Entamoeba* species as outgroups, based on  
 249 alignment-free comparisons of complete proteomes.  
 250

251 To characterize the proteome further and expand the pool of potential targets, we conducted  
 252 preliminary functional annotations of the haploid proteome dataset. Functional annotation of the  
 253 EviGene “main” protein sequences with PANNZER2, one of the top-10 rapid methods in the  
 254 CAFA2 NK-full benchmark, provided 23% of the sequences with a description and 63% with a  
 255 lower level GO molecular function term (40% describing a specific activity). A plot of high-level  
 256 GO terms compared with those obtained for *A. castellanii* and *D. discoideum*, one of the most



257 thoroughly annotated amoebas in UniProt, shows a similar profile for the three species, with  
 258 differences limited to smaller gene families representing less than 1% of the genes (**Figure 3**).  
 259 With the caveat that the absence of a gene could be due to assembly errors, *Balamuthia* as well  
 260 as *Acanthamoeba* appear to be comparatively depleted of genes associated with ubiquitin-  
 261 mediated protein tagging. The biological implications are unclear. In contrast, the apparent  
 262 depletion of adhesion genes in *Acanthamoeba* is surprising given the central role of host cell  
 263 adhesion in *A. castellanii* pathogenesis<sup>36</sup>, even though the absence of Sib cell-adhesion proteins  
 264 has been reported previously<sup>32</sup>. In terms of potential targets for SBDD, the *Balamuthia* GO  
 265 annotations classified 858 (5%) of proteins as having kinase activity, of which about half (424)  
 266 were classified as protein kinases. Our phenotypic screens identified potential kinase targets, but  
 267 further analysis is needed to determine their specific sequence and target the kinome with  
 268 accuracy<sup>37</sup>.  
 269

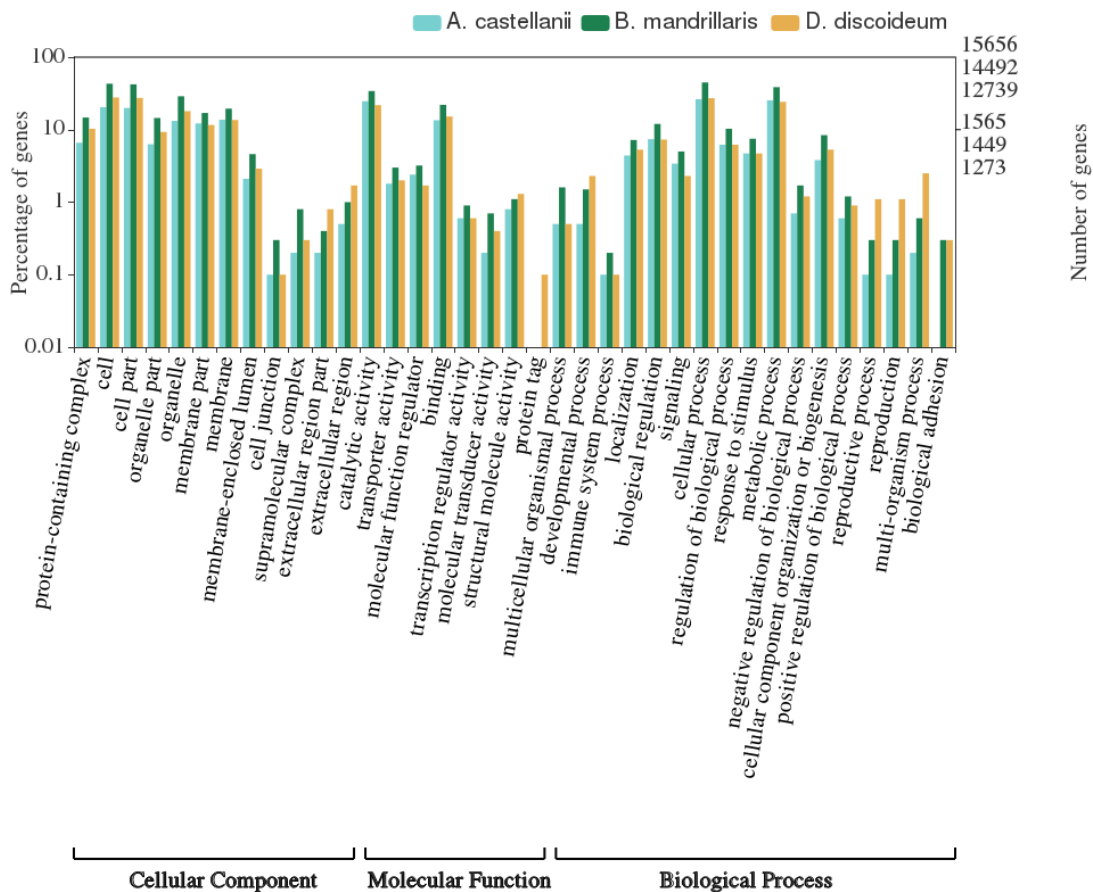

270 **Figure 3: Level 2 top GO annotations.** *B. mandrillaris* proteins (dark green) vs *A. castellanii* (cyan) and *D.*  
 271 *discoideum* (orange) as percentage of genes and total number of genes on a log(10) scale, significant relationships p-  
 272 value < 0.05.  
 273

## 274 Target identification and validation

275 For this study, protein kinases from the phenotypic screens were left out, leaving a total of 25  
 276 potential targets, to which we added 6 known drug targets requested from the amoeba  
 277 community. From this list of 31 targets, 19 could be assigned to specific human protein  
 278 sequences. A total of 14 *Balamuthia* sequences for 13 targets (there are 2 copies of

279 topoisomerase II) were identified from a BLASTP search with the human sequences: 12 from the  
 280 screens, and 2 known drug targets. Average pairwise identity was 49% with 77% coverage.  
 281 Another three of the known drug targets were not detected by BLASTP searches of the  
 282 *Balamuthia* proteome using the human sequences, therefore *Acanthamoeba* sequences were used  
 283 instead. This yielded a total of 17 *Balamuthia* sequences that were entered into the SSGCID  
 284 gene-to-structure pipeline. Truncations around putative catalytic domains were designed for 9 of  
 285 the 17 sequences to increase crystallization likelihood, leading to 23 constructs as cloning  
 286 candidates. PCR amplification produced clones for 18 constructs. Direct sequencing was  
 287 successful for 15 of these and sequence comparison with the "main" proteins from the EviGene  
 288 assembly showed excellent matches with over 99% average amino acid identity, corresponding  
 289 to 2 amino acid variations on average per sequence, and 100% coverage for all, but the two  
 290 largest proteins (84% coverage and 100% identity for the 1,068 amino-acid long Exportin-1,  
 291 81% coverage and 99% identity for the 784 residue primase and C-term domains of  
 292 topoisomerase II).

293  
 294 The identity between the 15 validated protein sequences and their closest *A. castellanii*  
 295 homologue ranged between 56% to 88%, with 3 notable exceptions; exportin-1 (21% identity),  
 296 lanosterol 14-alpha demethylase (CYP51A) (28% identity) and glucokinase (51% identity). In  
 297 the case of exportin-1, a multiple sequence alignment indicated that the *Balamuthia* protein was  
 298 over 50% identical to the *Naegleria fowleri* and *Planoprotostelium fungivorum* proteins,  
 299 suggesting potential mis-assembly in the *A. castellanii* genome. Similarly, the *Acanthamoeba*  
 300 glucokinase sequence appears to have a large deletion of over 30 residues compared to the  
 301 *Balamuthia* and *Naegleria* sequences. This region corresponds to a double-stranded beta-sheet  
 302 that lies in the glucose binding pocket in the *Naegleria* structure, and we would expect it to be  
 303 conserved in *Acanthamoeba* (Figure 4)<sup>15</sup>. As for CYP51A, pairwise identity between the closest  
 304 *Balamuthia*, *Acanthamoeba* and *Naegleria* sequences ranged between 20% and 24%, suggesting  
 305 a large divergence in this protein family. Hence, with the exception of CYP51A, the validated  
 306 targets from *Balamuthia* are likely to share similar binding pockets in *A. castellanii*, as they lie  
 307 within the overall 55% sequence identity threshold that was shown to be associated with a  
 308 conserved active site in bacteria<sup>38</sup>. However, the same threshold might not apply to Eukaryotic  
 309 enzymes.

310

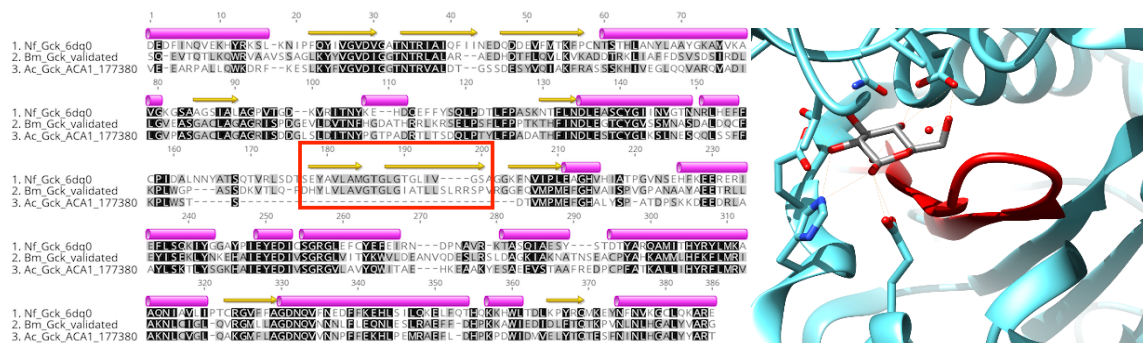

311  
 312 **Figure 4: Sequence conservation of glucokinase in 3 pathogenic amoebas.** Potential misassembly of the *A.*  
 313 *castellanii* glucokinase (AmoebaDB ACA1\_177380) highlighted on a multiple sequence alignment with the *B.*  
 314 *mandrillaris* validated sequence (this study) and *N. fowleri* crystal structure (PDB: 6DA0)<sup>15</sup>; helical regions are  
 315 annotated as pink tubes and beta-sheets as yellow arrows. The alignment was obtained with T-Coffee-Expresso<sup>39</sup>.  
 316 The double-stranded beta-sheet missing in *A. castellanii* glucokinase is colored in red on the active site of the *B.*  
 317 *mandrillaris* structure (PDB: 6VZZ)

318  
 319 Of the 13 targets that were also found in human, five shared over 55% sequence identity overall  
 320 to their human counterpart and might potentially have similar active sites: S-adenosyl-  
 321 homocysteine (SAHH), 3-hydroxy-3-methylglutaryl-coenzyme A reductase (HMGR), heat-  
 322 shock protein 90-alpha (HSP90 $\alpha$ ), histone deacetylase 1 (HDAC1) and exportin-1 (XPO1)  
 323 (**Table 3**). As a consequence, SBDD for these targets will likely require exploration of potential  
 324 alternate binding sites that are specific to the *Balamuthia* protein. We would expect selectivity to  
 325 be more readily achievable for the other targets, with the topoisomerase ATPases as borderline  
 326 cases. One promising example of a *Balamuthia* target that can be selectively targeted is the  
 327 GARTFase domain of trifunctional purine biosynthetic protein adenosine-3 (GART). *Balamuthia*  
 328 GARTFase has a low sequence identity to the human enzyme (37%) and has a different domain  
 329 arrangement than in human GART. Whereas GARTFase is the C-terminal domain of human  
 330 GART, it is the middle domain in *Balamuthia* (**Figure 5**). This domain arrangement, confirmed  
 331 by direct sequencing and conserved in *Acanthamoeba*, leads us to postulate that targeting double  
 332 domains in GART may offer a promising avenue to develop drugs against those pathogenic  
 333 amoebas.  
 334

| Balamuthia target                                                             | Pairwise identity | Target coverage | Closest human protein      |
|-------------------------------------------------------------------------------|-------------------|-----------------|----------------------------|
| S-adenosyl-L-homocysteine hydrolase                                           | 58%               | 98%             | sp P23526 SAHH_HUMAN       |
| Histone deacetylase 1                                                         | 73%               | 83%             | sp Q13547 HDAC1_HUMAN      |
| Lanosterol 14-alpha demethylase (CYP51A)**                                    | 26%               | 96%             | sp Q16850 CP51A_HUMAN      |
| Methionyl-tRNA synthetase (methionine tRNA ligase) (MetRS)**                  | 54%               | 79%             | sp P56192 SYMC_HUMAN       |
| Heat shock protein HSP90-alpha                                                | 69%               | 100%            | sp P07900 HS90A_HUMAN      |
| Calcium ATPase, haloacid dehydrogenase (HAD) domain                           | 43%               | 100%            | tr A0A0A0MSP0 ATP2C2_HUMAN |
| 3-hydroxy-3-methylglutaryl-CoA reductase (HMG-CoA reductase) (HMGR)           | 62%               | 97%             | sp P04035 HMDH_HUMAN       |
| Glucokinase**                                                                 | -                 | -               | none                       |
| DNA topoisomerase II copy 1, ATPase and transducer domains                    | 55%               | 97%             | sp Q02880 TOP2B_HUMAN      |
| DNA topoisomerase II copy 1, toprim and C-term domains                        | 49%               | 99%             | sp P11388 TOP2A_HUMAN      |
| DNA topoisomerase II copy 2, ATPase and transducer domains                    | 52%               | 97%             | sp P11388 TOP2A_HUMAN      |
| DNA topoisomerase II copy 2, toprim and C-term domains                        | 39%               | 80%*            | sp Q02880 TOP2B_HUMAN      |
| Exportin-1 (CRM1, XPO1)                                                       | 57%               | 83%*            | sp O14980 XPO1_HUMAN       |
| Xylose isomerase (xylA)                                                       | -                 | -               | none                       |
| Trifunctional purine biosynthetic protein adenosine-3 (GART), GARTFase domain | 37%               | 82%             | sp P22102 PUR2_HUMAN       |

335  
 336 **Table 3. Sequence similarity (BLASTP) between *Balamuthia* validated sequences and UniProt identifiers of**  
 337 **closest human counterpart.** (\*) indicate lower than expected coverage due to incomplete sequencing of the clones;  
 338 (\*\*) indicate additional targets selected independently of the Calibr screens. Note that homology to human  
 339 Glucokinase was too low to be detected with BLASTP at the chosen E-value (1e-3).  
 340

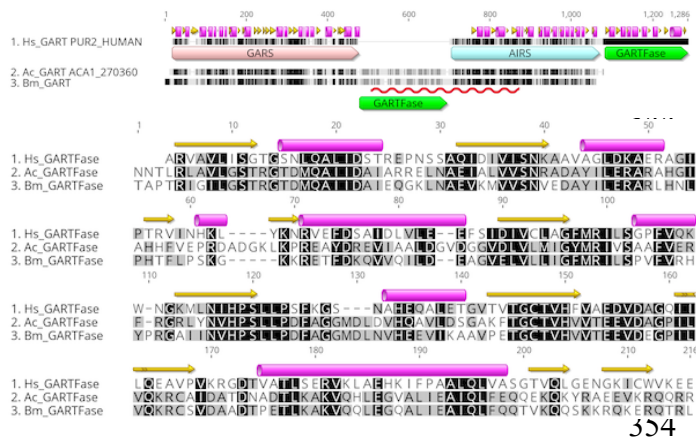

**Figure 5:** Top: Domain arrangement in human, *A. castellanii* and *B. mandrillaris* GART. Domains are annotated as large arrows on the alignment and higher level of residue conservation is represented as darker shades of gray. The region validated by direct sequencing in *Balamuthia* is underlined with a red squiggle. Secondary structure elements from human GART crystal structures are taken from UniProt. Bottom: Alignment of the GARTFase domains extracted from the GART sequences above.

## 355 Conclusion

356 Through drug susceptibility screening with known antiparasitic compounds against *B.*  
 357 *mandrillaris*, we identified protein targets with potential for treating *Balamuthia* granulomatous  
 358 amoebic encephalitis. The reconstruction of the proteome from RNA-seq and annotation of the  
 359 proteome allowed us to amplify, clone and validate the *B. mandrillaris* targets by direct  
 360 sequencing. Our results indicate that the haploid proteome, consisting of the EviGene “main”  
 361 proteins, is of high quality and provides an essential resource for further drug discovery and  
 362 biological investigation. This study illustrates how the combination of phenotypic drug screening  
 363 and a single RNA-seq experiment with short reads are enabling structure-based drug design  
 364 against a eukaryotic pathogen with no prior proteome information.

## 365 Materials and methods

### 366 Cell culture

#### 367 Maintenance of *Balamuthia mandrillaris*

368 The pathogenic *B. mandrillaris* (CDC:V039; ATCC 50209), a GAE isolate, isolated from a  
 369 pregnant Baboon at the San Diego Zoo in 1986 was donated by Luis Fernando Lares-Jiménez  
 370 ITSON University, Mexico<sup>28</sup>. Trophozoites were routinely grown axenically in BMI media at  
 371 37°C, 5% CO<sub>2</sub> in vented 75 cm<sup>2</sup> tissue culture flasks (Olympus), until the cells were 80-90%  
 372 confluent. For sub-culturing, 0.25% Trypsin-EDTA (Gibco) cell detachment reagent was used to  
 373 detach the cells from the culture flasks. The cells were collected by centrifugation at 4,000 rpm  
 374 at 4°C. Complete BMI media is produced by the addition of 10 % fetal bovine serum and 125 µg  
 375 of penicillin/streptomycin antibiotics. All experiments were performed using logarithmic phase  
 376 trophozoites.

### 377 Target identification

#### 378 Phenotypic Screening

379 We previously developed and standardized robust high-throughput screening methods for the  
 380 discovery of active compounds against *B. mandrillaris* trophozoites<sup>28</sup>. The trophocidal activity of  
 381 compounds were assessed using the CellTiter-Glo 2.0 luminescent cell viability assay (Promega,  
 382 Madison, WI). In brief, *B. mandrillaris* trophozoites cultured in BMI-complete media were

383 seeded at 16,000 cells/well into 96-well plates (Thermo Fisher 136102) with various compounds  
384 diluted in 2-fold serial dilutions to determine the 50% inhibitory concentration (IC<sub>50</sub>). The  
385 highest percentage of DMSO diluted in the highest screening drug concentration was 1%.  
386 Control wells were supplemented with 1 % DMSO or 12.5 μM of chlorhexidine, as negative and  
387 positive controls, respectively. All assays were incubated at 37°C for 72 hours. At the end time  
388 point, 25 μL of CellTiter-Glo reagent was added to all wells. The plates were shaken using an  
389 orbital shaker at 300 rpm at room temperature for 2 minutes to induce cell lysis. After shaking,  
390 the plates were equilibrated at room temperature for 10 minutes to stabilize the luminescent  
391 signal. The ATP luminescent signal (relative light units; RLUs) were measured at 490 nm by  
392 using a SpectraMax i3X (Molecular Devices, Sunnyvale, CA). Drug inhibitory concentration  
393 (IC<sub>50</sub>) curves were generated using total ATP RLUs where controls were calculated as the  
394 average of replicates using the Levenberg-Marquardt algorithm, using DMSO as the  
395 normalization control, as defined in CDD Vault (Burlingame, CA, USA). Values reported are  
396 from a minimum of two biological replicates with standard error of the mean.

397

### 398 **Selection of Target Genes**

399 The protein names for verified potential targets were retrieved through Calibr at Scripps  
400 Research (<https://reframedb.org/>). The corresponding human protein sequences were  
401 downloaded from UniProt and queried against the *B. mandrillaris* assemblies using BLAST  
402 sequence similarity searches. Candidate targets were confirmed by comparing their protein  
403 sequences with closest sequence homologues in *Acanthamoeba* and *Naegleria* species and  
404 checking the *B. mandrillaris* functional annotation, where available. ORFs were selected for  
405 cloning from the Trinity *de-novo* assembly. Manual correction of putative start sites from  
406 multiple sequence alignments was performed with Geneious Prime 2019.1.1  
407 (<https://www.geneious.com>).

## 408 **RNA extraction, library preparation and sequencing**

### 409 **RNA Extraction**

410 *B. mandrillaris* were cultured and harvested as described above; the cells were counted and  
411 adjusted to 2 million cells for each extraction. Total RNA isolated using the RNA extraction kit  
412 (Agilent) as per manufacturing instructions. In brief, to the pellet of *Balamuthia* cells, 350 μl of  
413 lysis buffer and 2.5 μL of β-mercaptoethanol were added and homogenized. This was transferred  
414 into a prefilter spin cup and centrifuged at maximum speed, 14,000 x g, for 5 minutes. The  
415 filtrate was retained and an equal volume of 70% ethanol was added to the filtrate and vortexed  
416 until the filtrate and ethanol were mixed thoroughly. This mixture was then transferred into an  
417 RNA binding spin cup and receptacle tube and centrifuged at maximum speed for 1 minute. The  
418 filtrate was discarded and 600 μL of 1x low salt buffer was added and centrifuged at maximum  
419 speed for 1 minute. The filtrate was removed and centrifuged at maximum speed for 2 minutes.  
420 DNase solution was added and incubated for 15 minutes at 37°C. After incubation 600 μL of 1x  
421 high salt buffer (contains guanidine thiocyanate) was added and centrifuged at maximum speed  
422 for 1 minute. The filtrate was discarded and 300 μL of 1x low salt buffer was added and  
423 centrifuged at maximum speed for 2 minutes. 100 μL of elution buffer was added and incubated  
424 at room temperature for 2 minutes. Final elution was into a sterile 1.5 mL microcentrifuge tube at  
425 maximum speed for 1 minute.

426 Extracted RNA was stored at -80°C until further required. The integrity and purity of the RNA  
427 was assessed via RT-PCR and gel electrophoresis on a 2% agarose gel. The concentration was  
428 determined by measuring 280nm absorbance on a nanodrop (Nanodrop 1000, Thermo  
429 Scientific).

430  
431 RNA quality was reassessed after a freeze thaw cycle using the Bioanalyzer RNA 6000 pico chip  
432 (Agilent, 5067-1513) and quantity was assessed using the Qubit RNA Broad Range Assay  
433 (Invitrogen, Q10210). The mRNA was isolated using the NEB Poly(A) mRNA Magnetic  
434 Isolation Module (NEB, E7490S) and prepared using a version of the Stranded RNA-seq  
435 protocol that was modified for *Leishmania*<sup>40,41</sup>. Only the negative stranded RNA-seq library  
436 preparation portion was performed. Library quantity and quality was assessed using the Qubit  
437 dsDNA High Sensitivity Assay (Invitrogen, Q32851), Bioanalyzer High Sensitivity DNA Chip  
438 (Agilent, 5067-4627) and the KAPA library quantification kit (Roche, KK4824). Libraries were  
439 sequenced on the Illumina Hiseq 4000, yielding 2 x 75 bp paired end reads.

## 440 Transcripts assembly and annotation

441 Reads were quality filtered with Trimmomatic and assembled *de-novo* with Trinity v2.8 (k-  
442 mer=25) and Spades v3.13 (k-mer=29 and 33) after clipping of the adaptor sequences<sup>42-44</sup>.  
443 Further, quality-filtered reads were aligned to the published *B. mandrillaris* genome LFUI01  
444 with STAR v2.6 and assembled with Trinity<sup>45</sup>. The three assemblies thus obtained were  
445 combined with EvidentialGene v19jan01 (EviGene) with BUSCO homology scores as input for  
446 the classifier<sup>31</sup>. Throughout the analysis, BUSCO v3 analysis was performed on either the  
447 European or Australian Galaxy mirrors<sup>46,47</sup>. The Trinity *de-novo* assembly was functionally  
448 annotated with Trinotate<sup>48</sup>. Trinotate annotation sources included BLASTX and BLASTP  
449 homology searches against Swiss-Prot and AmoebaDB *A. castellanii*, PFAM domain analysis, as  
450 well as secretion and trans-membrane domain predictions with SignalP and TmHMM,  
451 respectively. Functional descriptions and gene ontology (GO) annotations of the EviGene ‘main’  
452 proteins were predicted with PANNZER2<sup>49</sup>. GO annotations that were highest ranked by  
453 PANNZER2 were visualized with WEGO 2.0<sup>50</sup>.

## 454 Comparison to other species and phylogenetic analysis

455 Proteome comparisons to other species in the UniProt database were obtained from the AAI-  
456 profiler server<sup>51</sup>. Cluster analysis and Venn diagrams of orthologous clusters were generated  
457 with OrthoVenn2<sup>52</sup>. Unless otherwise specified, all BLAST searches were performed with  
458 BLAST+ v2.8.1 and an expectation value of 0.001<sup>53</sup>. Pairwise distances for alignment-free  
459 phylogeny reconstruction were calculated with Prot-SpaM<sup>54</sup>. Input sequences included the  
460 *Balamuthia* EviGene ‘main’ proteins (this study), AmoebaDB *A. castellanii* strain Neff, *N.*  
461 *fowleri* ATCC 30894 Braker1 predicted proteins<sup>55</sup> and UniProt complete reference proteomes (*C.*  
462 *fasciculata* UP000007797, *N. gruberi* UP000006671, *P. pallidum* UP000001396, *D. discoideum*  
463 UP000002195, *P. fungivorum* UP000241769 and *T. lacteum* UP000076078). Phylogenetic  
464 relationships were inferred by constructing a neighbor-joining tree from the word match-based  
465 Prot-SpaM distance matrix using MEGA X<sup>56,57</sup>.

## 466 PCR and sequence validation

### 467 Cloning

468 All *B. mandrillaris* constructs were cloned, expressed, and purified using SSGCID established  
469 protocols<sup>58,59</sup>. The genes selected were PCR-amplified using cDNA template and purchased  
470 primers (Integrated DNA Technologies, Inc., Coralville, IA) (**Table S1**). The amplicons were  
471 extracted, purified and cloned into a ligation-independent cloning pET-14b derived, N-terminal  
472 His tag expression vector pBG1861 with a T7 promoter<sup>60</sup>. The cloned inserts were then  
473 transformed into purchased GC-5 cells (Genesee Scientific, El Cajon, CA) for ORF  
474 incorporation. Plasmid DNA was purified from the subsequent colonies and further transformed  
475 in chemically competent *E. coli* BL-21(DE3)R3 Rosetta cells with a chloramphenicol restriction.

### 477 Sequence Validation

478 Each *B. mandrillaris* construct was sequenced from both 5'- and 3'-ends with a custom forward  
479 primer (5'-GCGTCCGGCGTAGAGGATC-3', 40nt upstream from the T7 promoter customary  
480 forward primer) and the T7 terminator reverse primer (5'-GCTAGTTATTGCTCAGCGG-3') at  
481 GeneWiz (South Plainfield, NJ). The reads were assembled and matched to the expected  
482 sequences with the phrap assembler and cross\_match<sup>61</sup>. Translations of the longest ORF in all six  
483 frames of the consensus sequence (or the forward read if unassembled) were then aligned using  
484 MUSCLE<sup>62</sup> with the SSGCID target protein sequence to determine the best translated protein  
485 sequence and its alignment, percent identity and percent coverage. Manual examination of the  
486 sequences and alignments was performed in Geneious.

## 487 Data availability

488 Illumina raw reads have been deposited at the National Center for Biotechnology Information  
489 (NCBI) BioProject repository with the accession number SRR12006108 under project  
490 PRJNA638697. The annotated protein sequences from the EviGene 'main' assembly are  
491 available on NIH Figshare under DOI: <https://doi.org/10.35092/yhjc.12478733.v1>. All data that  
492 are associated with the drug susceptibility study are archived using the database from  
493 Collaborative Drug Discovery (CDD; <http://www.collaborativedrug.com/>). The CDD database  
494 accommodates both compound chemistry data and results from phenotypic or target activity,  
495 cytotoxicity screening, and computed properties. The CDD database is becoming an established  
496 standard for the sharing of data within this community and we are eager to facilitate the  
497 distribution of our results in a similar manner.

## 498 Notes

499 **Author contributions.** Conceptualization, I.Q.P., C.A.R., D.E.K., and P.J.M.; methodology,  
500 I.Q.P., C.A.R., J.C., J.M., S.S. and L.T.; validation, I.Q.P. and C.A.R.; formal analysis, I.Q.P.,  
501 C.A.R., R.E.N., V.S., J.C. and S.S.; resources, D.E.K., W.C.V.V., J.C.M., and P.J.M.; data  
502 curation, I.Q.P. and C.A.R.; writing-original draft preparation, I.Q.P. and C.A.R.; writing-review  
503 and editing I.Q.P., C.A.R., R.E.N., V.S., S.S., L.K.B., J.C.M., D.E.K., W.C.V.V., and P.J.M.;  
504 visualization, I.Q.P. and C.A.R.; supervision, I.Q.P., C.A.R., D.E.K., W.C.V.V. J.C.M., and

505 P.J.M.; funding acquisition, D.E.K., W.C.V.V., J.C.M. and P.J.M. All authors have read and  
506 agreed to the published version of the manuscript.

507

508 **Competing interests.** W.C. Van Voorhis is a co-owner of ParaTheraTech, Inc, a small biotech  
509 that aims to market compounds for the therapy of parasitic diseases in Animal Health. All other  
510 authors declare no competing interests.

## 511 Acknowledgements

512 We thank Drs. Luis Fernando Lares-Jiménez & Fernando Lares-Villa (Instituto Tecnológico de  
513 Sonora, Ciudad Obregón, Sonora, Mexico) for the pathogenic isolate of *B. mandrillaris* used in  
514 this study. The authors acknowledge the support of the Freiburg Galaxy Team led by Prof. Rolf  
515 Backofen, Bioinformatics, University of Freiburg, Germany funded by Collaborative Research  
516 Centre 992 Medical Epigenetics (DFG grant SFB 992/1 2012) and German Federal Ministry of  
517 Education and Research (BMBF grant 031 A538A de.NBI-RBC). Rooksana Noorai was supported  
518 by an Institutional Development Award (IDeA) from the National Institute of General Medical  
519 Sciences of the National Institutes of Health under grant number P20GM109094. This project has  
520 been funded in part with Federal funds from the National Institute of Allergy and Infectious  
521 Diseases, National Institutes of Health, Department of Health and Human Services, under Contract  
522 No.: HHSN272201700059C and the Georgia Research Alliance (GRA) also supported this work.

## 523 References

- 524 1. Visvesvara, G. S., Schuster, F. L. & Martinez, A. J. Balamuthia mandrillaris, N. G., N. Sp.,  
525 agent of amebic meningoencephalitis in humans and other animals. *J. Eukaryot. Microbiol.*  
526 **40**, 504–514 (1993).
- 527 2. Schuster, F. L. *et al.* Environmental Isolation of Balamuthia mandrillaris Associated with a  
528 Case of Amebic Encephalitis. *J. Clin. Microbiol.* **41**, 3175 (2003).
- 529 3. Cabello-Vílchez, A. M. *et al.* The isolation of Balamuthia mandrillaris from environmental  
530 sources from Peru. *Parasitol. Res.* **113**, 2509–2513 (2014).
- 531 4. Niyiyati, M., Karamati, S. A., Lorenzo Morales, J. & Lasjerdi, Z. Isolation of Balamuthia  
532 mandrillaris from soil samples in North-Western Iran. *Parasitol. Res.* **115**, 541–545 (2016).
- 533 5. Gompf, S. G. & Garcia, C. Lethal encounters: The evolving spectrum of amoebic  
534 meningoencephalitis. *IDCases* **15**, e00524 (2019).



- 535 6. Cope, J. R. *et al.* The Epidemiology and Clinical Features of Balamuthia mandrillaris Disease  
536 in the United States, 1974-2016. *Clin. Infect. Dis.* **68**, 1815–1822 (2019).
- 537 7. Shehab, K. W., Aboul-Nasr, K. & Elliott, S. P. Balamuthia mandrillaris Granulomatous Amebic  
538 Encephalitis With Renal Dissemination in a Previously Healthy Child: Case Report and  
539 Review of the Pediatric Literature. *J Pediatric Infect Dis Soc* **7**, e163–e168 (2018).
- 540 8. Yang, Y., Hu, X., Min, L., Dong, X. & Guan, Y. Balamuthia mandrillaris-Related Primary  
541 Amoebic Encephalitis in China Diagnosed by Next Generation Sequencing and a Review of  
542 the Literature. *Lab Med* (2019) doi:10.1093/labmed/lmz079.
- 543 9. Pritzker, A. S., Kim, B. K., Agrawal, D., Southern, P. M. & Pandya, A. G. Fatal granulomatous  
544 amoebic encephalitis caused by Balamuthia mandrillaris presenting as a skin lesion. *J. Am.*  
545 *Acad. Dermatol.* **50**, S38-41 (2004).
- 546 10. Anderson, A. C. The process of structure-based drug design. *Chem. Biol.* **10**, 787–797  
547 (2003).
- 548 11. Byington, C. L., Dunbrack, R. L., Whitby, F. G., Cohen, F. E. & Agabian, N. Entamoeba  
549 histolytica: computer-assisted modeling of phosphofructokinase for the prediction of broad-  
550 spectrum antiparasitic agents. *Exp. Parasitol.* **87**, 194–202 (1997).
- 551 12. Thomson, S. *et al.* Characterisation of sterol biosynthesis and validation of 14 $\alpha$ -  
552 demethylase as a drug target in Acanthamoeba. *Sci Rep* **7**, 8247 (2017).
- 553 13. Debnath, A. *et al.* CYP51 is an essential drug target for the treatment of primary  
554 amoebic meningoencephalitis (PAM). *PLoS Negl Trop Dis* **11**, e0006104 (2017).
- 555 14. Kidane, M. E. *et al.* Sterol methyltransferase a target for anti-amoeba therapy: towards  
556 transition state analog and suicide substrate drug design. *J. Lipid Res.* **58**, 2310–2323  
557 (2017).
- 558 15. Milanes, J. E. *et al.* Enzymatic and Structural Characterization of the Naegleria fowleri  
559 Glucokinase. *Antimicrob. Agents Chemother.* **63**, (2019).

- 560 16. Rice, C. A. *et al.* Structural and functional studies of histidine biosynthesis in  
561 *Acanthamoeba* spp. demonstrates a novel molecular arrangement and target for  
562 antimicrobials. *PLoS ONE* **13**, e0198827 (2018).
- 563 17. Henriquez, F. L. *et al.* The *Acanthamoeba* shikimate pathway has a unique molecular  
564 arrangement and is essential for aromatic amino acid biosynthesis. *Protist* **166**, 93–105  
565 (2015).
- 566 18. Greninger, A. L. *et al.* Clinical metagenomic identification of *Balamuthia mandrillaris*  
567 encephalitis and assembly of the draft genome: the continuing case for reference genome  
568 sequencing. *Genome Med* **7**, 113 (2015).
- 569 19. Detering, H. *et al.* First Draft Genome Sequence of *Balamuthia mandrillaris*, the  
570 Causative Agent of Amoebic Encephalitis. *Genome Announc* **3**, (2015).
- 571 20. Myler, P. J. *et al.* The Seattle Structural Genomics Center for Infectious Disease  
572 (SSGCID). *Infectious disorders drug targets* **9**, 493–506 (2009).
- 573 21. Schuster, F. L. & Visvesvara, G. S. Efficacy of novel antimicrobials against clinical  
574 isolates of opportunistic amebas. *J. Eukaryot. Microbiol.* **45**, 612–618 (1998).
- 575 22. McGhee, P. *et al.* In vitro activity of CEM-101 against *Streptococcus pneumoniae* and  
576 *Streptococcus pyogenes* with defined macrolide resistance mechanisms. *Antimicrob. Agents*  
577 *Chemother.* **54**, 230–238 (2010).
- 578 23. Hamilton-Miller, J. M. Chemistry and biology of the polyene macrolide antibiotics.  
579 *Bacteriol Rev* **37**, 166–196 (1973).
- 580 24. Schuster, F. L. & Visvesvara, G. S. Axenic growth and drug sensitivity studies of  
581 *Balamuthia mandrillaris*, an agent of amoebic meningoencephalitis in humans and other  
582 animals. *J. Clin. Microbiol.* **34**, 385–388 (1996).
- 583 25. Laurie, M. T. *et al.* Functional Assessment of 2,177 U.S. and International Drugs  
584 Identifies the Quinoline Nitroxoline as a Potent Amoebicidal Agent against the Pathogen  
585 *Balamuthia mandrillaris*. *mBio* **9**, (2018).

- 586 26. Schuster, F. L., Guglielmo, B. J. & Visvesvara, G. S. In-vitro activity of miltefosine and  
587 voriconazole on clinical isolates of free-living amebas: *Balamuthia mandrillaris*,  
588 *Acanthamoeba* spp., and *Naegleria fowleri*. *J. Eukaryot. Microbiol.* **53**, 121–126 (2006).
- 589 27. Ahmad, A. F., Heaselgrave, W., Andrew, P. W. & Kilvington, S. The in vitro efficacy of  
590 antimicrobial agents against the pathogenic free-living amoeba *Balamuthia mandrillaris*. *J.*  
591 *Eukaryot. Microbiol.* **60**, 539–543 (2013).
- 592 28. Rice, C. A., Lares-Jiménez, L. F., Lares-Villa, F. & Kyle, D. E. In vitro screening of the  
593 open source MMV Malaria and Pathogen Boxes to discover novel compounds with activity  
594 against *Balamuthia mandrillaris*. *Antimicrob. Agents Chemother.* (2020)  
595 doi:10.1128/AAC.02233-19.
- 596 29. Rice, C. A., Colon, B. L., Chen, E., Hull, M. V. & Kyle, D. E. Discovery of repurposing  
597 drug candidates for the treatment of diseases caused by pathogenic free-living amoebae.  
598 *bioRxiv* 2020.05.13.093922 (2020) doi:10.1101/2020.05.13.093922.
- 599 30. Sierra, S. *et al.* Statins as neuroprotectants: a comparative in vitro study of lipophilicity,  
600 blood-brain-barrier penetration, lowering of brain cholesterol, and decrease of neuron cell  
601 death. *J. Alzheimers Dis.* **23**, 307–318 (2011).
- 602 31. Gilbert, D. G. Genes of the pig, *Sus scrofa*, reconstructed with EvidentialGene. *PeerJ* **7**,  
603 (2019).
- 604 32. Clarke, M. *et al.* Genome of *Acanthamoeba castellanii* highlights extensive lateral gene  
605 transfer and early evolution of tyrosine kinase signaling. *Genome biology* **14**, R11 (2013).
- 606 33. Shabardina, V., Kischka, T., Kmita, H., Suzuki, Y. & Makalowski, W. Environmental  
607 adaptation of *Acanthamoeba castellanii* and *Entamoeba histolytica* at genome level as seen  
608 by comparative genomic analysis. *Int J Biol Sci* **14**, 306–320 (2018).
- 609 34. Waterhouse, R. M. *et al.* BUSCO applications from quality assessments to gene  
610 prediction and phylogenomics. *Mol. Biol. Evol.* (2017) doi:10.1093/molbev/msx319.

- 611 35. Somervuo, P. & Holm, L. SANSparallel: interactive homology search against Uniprot.  
612 *Nucleic Acids Res.* **43**, W24-29 (2015).
- 613 36. Kennett, M. J., Hook, R. R., Franklin, C. L. & Riley, L. K. Acanthamoeba castellanii:  
614 characterization of an adhesin molecule. *Exp. Parasitol.* **92**, 161–169 (1999).
- 615 37. Stroehlein, A. J., Young, N. D. & Gasser, R. B. Improved strategy for the curation and  
616 classification of kinases, with broad applicability to other eukaryotic protein groups. *Sci Rep*  
617 **8**, 6808 (2018).
- 618 38. Baugh, L. *et al.* Increasing the structural coverage of tuberculosis drug targets.  
619 *Tuberculosis (Edinburgh, Scotland)* **95**, 142–8 (2015).
- 620 39. Di Tommaso, P. *et al.* T-Coffee: a web server for the multiple sequence alignment of  
621 protein and RNA sequences using structural information and homology extension. *Nucleic*  
622 *Acids Res.* **39**, W13-17 (2011).
- 623 40. Hunt, A. G. A rapid, simple, and inexpensive method for the preparation of strand-  
624 specific RNA-Seq libraries. *Methods Mol. Biol.* **1255**, 195–207 (2015).
- 625 41. Myler, P. J., McDonald, J. A., Alcolea, P. J. & Sur, A. Quantitative RNA Analysis Using  
626 RNA-Seq. *Methods Mol. Biol.* **1971**, 95–108 (2019).
- 627 42. Bolger, A. M., Lohse, M. & Usadel, B. Trimmomatic: a flexible trimmer for Illumina  
628 sequence data. *Bioinformatics* **30**, 2114–2120 (2014).
- 629 43. Haas, B. J. *et al.* De novo transcript sequence reconstruction from RNA-seq using the  
630 Trinity platform for reference generation and analysis. *Nat Protoc* **8**, 1494–1512 (2013).
- 631 44. Bushmanova, E., Antipov, D., Lapidus, A. & Prjibelski, A. D. rnaSPAdes: a de novo  
632 transcriptome assembler and its application to RNA-Seq data. *Gigascience* **8**, (2019).
- 633 45. Dobin, A. *et al.* STAR: ultrafast universal RNA-seq aligner. *Bioinformatics* **29**, 15–21  
634 (2013).
- 635 46. Seppey, M., Manni, M. & Zdobnov, E. M. BUSCO: Assessing Genome Assembly and  
636 Annotation Completeness. *Methods Mol. Biol.* **1962**, 227–245 (2019).

- 637 47. Afgan, E. *et al.* Genomics Virtual Laboratory: A Practical Bioinformatics Workbench for  
638 the Cloud. *PLoS ONE* **10**, e0140829 (2015).
- 639 48. Bryant, D. M. *et al.* A Tissue-Mapped Axolotl De Novo Transcriptome Enables  
640 Identification of Limb Regeneration Factors. *Cell Rep* **18**, 762–776 (2017).
- 641 49. Törönen, P., Medlar, A. & Holm, L. PANNZER2: a rapid functional annotation web  
642 server. *Nucleic Acids Res.* **46**, W84–W88 (2018).
- 643 50. Ye, J. *et al.* WEGO 2.0: a web tool for analyzing and plotting GO annotations, 2018  
644 update. *Nucleic Acids Res.* **46**, W71–W75 (2018).
- 645 51. Medlar, A. J., Törönen, P. & Holm, L. AAI-profiler: fast proteome-wide exploratory  
646 analysis reveals taxonomic identity, misclassification and contamination. *Nucleic Acids Res.*  
647 **46**, W479–W485 (2018).
- 648 52. Xu, L. *et al.* OrthoVenn2: a web server for whole-genome comparison and annotation of  
649 orthologous clusters across multiple species. *Nucleic Acids Res.* **47**, W52–W58 (2019).
- 650 53. Camacho, C. *et al.* BLAST+: architecture and applications. *BMC Bioinformatics* **10**, 421  
651 (2009).
- 652 54. Leimeister, C.-A. *et al.* Prot-SpaM: fast alignment-free phylogeny reconstruction based  
653 on whole-proteome sequences. *Gigascience* **8**, (2019).
- 654 55. Liechti, N., Schürch, N., Bruggmann, R. & Wittwer, M. Nanopore sequencing improves  
655 the draft genome of the human pathogenic amoeba *Naegleria fowleri*. *Sci Rep* **9**, 16040  
656 (2019).
- 657 56. Kumar, S., Stecher, G., Li, M., Knyaz, C. & Tamura, K. MEGA X: Molecular Evolutionary  
658 Genetics Analysis across Computing Platforms. *Mol. Biol. Evol.* **35**, 1547–1549 (2018).
- 659 57. Stecher, G., Tamura, K. & Kumar, S. Molecular Evolutionary Genetics Analysis (MEGA)  
660 for macOS. *Mol. Biol. Evol.* (2020) doi:10.1093/molbev/msz312.

- 661 58. Stacy, R. *et al.* Structural genomics of infectious disease drug targets: the SSGCID. *Acta*  
662 *crystallographica. Section F, Structural biology and crystallization communications* **67**, 979–  
663 84 (2011).
- 664 59. Aslanidis, C. & de Jong, P. J. Ligation-independent cloning of PCR products (LIC-PCR).  
665 *Nucleic acids research* **18**, 6069–74 (1990).
- 666 60. Studier, F. W. Protein production by auto-induction in high density shaking cultures.  
667 *Protein expression and purification* **41**, 207–34 (2005).
- 668 61. Ewing, B. & Green, P. Base-calling of automated sequencer traces using phred. II. Error  
669 probabilities. *Genome Res.* **8**, 186–194 (1998).
- 670 62. Edgar, R. C. MUSCLE: multiple sequence alignment with high accuracy and high  
671 throughput. *Nucleic Acids Res.* **32**, 1792–1797 (2004).  
672
